# Supplementary material
Source: MDPI journal article supplement (https://www.mdpi.com/2624-862X/3/3/43)
Supplement: s1 [file s1]

## Supplementary material

**Table S1.** Chemical composition of individual feed offered at No. 1 Dairy (once-a-day milking) during the sampling season in early, mid, and late lactations in the 2020-2021 milking season.

| Lactation stage             | Early   |                               |                 |                  |         | Mid     |                  |         | Late             |         |                             |                    |
|-----------------------------|---------|-------------------------------|-----------------|------------------|---------|---------|------------------|---------|------------------|---------|-----------------------------|--------------------|
| Item                        | Pasture | Herb-mix<br>crop <sup>1</sup> | Maize<br>silage | DDG <sup>2</sup> | Tapioca | Pasture | Herb-mix<br>crop | Pasture | Herb-mix<br>crop | Tapioca | Corn gluten<br>feed pallets | Lucerne<br>baleage |
| CP <sup>3</sup> % of DM     | 23.1    | 18.0                          | 9.0             | 31.9             | 5.2     | 20.4    | 16.9             | 23.0    | 20.4             | 4.6     | 17.2                        | 30.7               |
| NDF <sup>4</sup> % of DM    | 40.3    | 33.2                          | 47.2            | 43.2             | 29.1    | 41.2    | 30.9             | 50.3    | 36.0             | 27.0    | 31.4                        | 40.1               |
| ADF <sup>5</sup> % of DM    | 21.2    | 21.2                          | 33.6            | 9.6              | 21.6    | 20.9    | 18.8             | 27.2    | 21.2             | 23.3    | 19.8                        | 32.3               |
| Lipid % of DM               | 4.4     | 3.7                           | 3.3             | 8.31             | 0.1     | 4.6     | 4.9              | 4.9     | 4.5              | -       | 6.2                         | 5.0                |
| SSS <sup>6</sup> % of DM    | 13.4    | 13.1                          | 28.3            | 12.8             | 40.7    | 15.1    | 11.1             | 9.8     | 5.6              | 35.4    | 7.0                         | 1.0                |
| ME <sup>7</sup> MJ ME/kg DM | 13.0    | 11.9                          | 9.8             | 7.9              | 11.3    | 11.8    | 13.0             | 9.3     | 10.8             | 10.8    | 7.8                         | 10.9               |

<sup>1</sup> Herb-mix comprises chicory (*Cichorium intybus*), plantain (*Plantago lanceolata*), and red clover (*Trifolium pratense*); <sup>2</sup> Dried distillers grain.

<sup>3</sup> CP= crude protein; <sup>4</sup> NDF= neutral detergent fibre; <sup>5</sup> ADF= acid detergent fibre; <sup>6</sup> SSS= soluble sugars and starch; <sup>7</sup> ME= metabolisable energy; Baleage is dried forage, developed from the process of bailing the forage.

**Table S2.** Chemical composition individual feed offered at No. 4 Dairy (twice-a-day milking) during the sampling season in early, mid, and late lactations in the 2020-2021 milking season.

| Lactation stage             | Early   |      |                 |             | Mid     |                  |       |                  | Late    |       |                  |                            |                 |
|-----------------------------|---------|------|-----------------|-------------|---------|------------------|-------|------------------|---------|-------|------------------|----------------------------|-----------------|
| Item                        | Pasture | Hay  | Maize<br>silage | Soy<br>meal | Pasture | Grass<br>baleage | Maize | DDG <sup>1</sup> | Pasture | Straw | Grass<br>baleage | Corn gluten<br>feed pallet | Maize<br>silage |
| CP <sup>2</sup> % of DM     | 22.4    | 13.0 | 6.7             | 35.2        | 23.1    | 9.7              | 7.7   | 17.5             | 30.4    | 2.7   | 15.9             | 17.1                       | 6.7             |
| NDF <sup>3</sup> % of DM    | 43.0    | 66.2 | 51.8            | 21.0        | 44.7    | 62.7             | 38.3  | 30.1             | 44.9    | 86.4  | 46.3             | 35.9                       | 47.4            |
| ADF <sup>4</sup> % of DM    | 21.0    | 39.1 | 20.6            | 13.0        | 21.3    | 37.0             | 29.7  | 18.6             | 20.1    | 54.8  | 29.6             | 21.1                       | 29.8            |
| Lipid % of DM               | 5.0     | 0.8  | 3.3             | 1.4         | 4.1     | 2.3              | 3.9   | 6.2              | 5.9     | 1.0   | 4.0              | 5.7                        | 3.2             |
| SSS <sup>5</sup> % of DM    | 14.1    | 2.2  | 40.5            | -           | 12.4    | 13.6             | 38.2  | 4.7              | 8.4     | 3.5   | 4.7              | 2.0                        | 32.9            |
| ME <sup>6</sup> MJ ME/kg DM | 11.4    | 7.3  | 11.3            | 12.8        | 11.0    | 8.0              | 10.2  | 7.6              | 10.9    | 3.5   | 12.4             | 7.2                        | 10.2            |

<sup>1</sup> Dried distillers grain.

<sup>2</sup> CP= crude protein; <sup>3</sup> NDF= neutral detergent fibre; <sup>4</sup> ADF= acid detergent fibre; <sup>5</sup> SSS= soluble sugars and starch; <sup>6</sup> ME= metabolisable energy; Baleage is dried forage, developed from the process of bailing the forage.

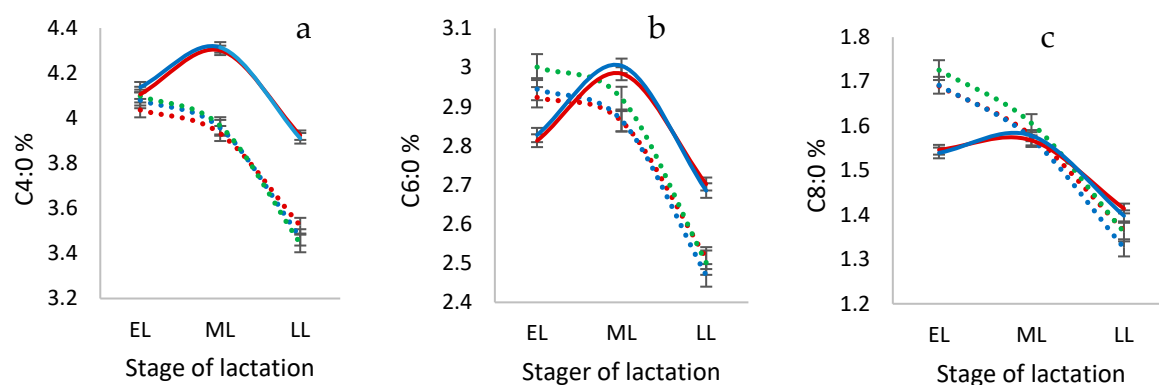

**Figure S1.** Concentrations of (a) C4:0, (b) C6:0 and (c) C8:0 in milk from Holstein-Friesian (....), Holstein-Friesian × Jersey (....) and Jersey (....) cows milked OAD and Holstein-Friesian (—) and Holstein-Friesian × Jersey (—) cows milked TAD during the production season 2020-2021. EL = early lactation (<90 days); ML = mid lactation (90-180 days); LL= late lactation (>180 days). The vertical bars show standard errors.

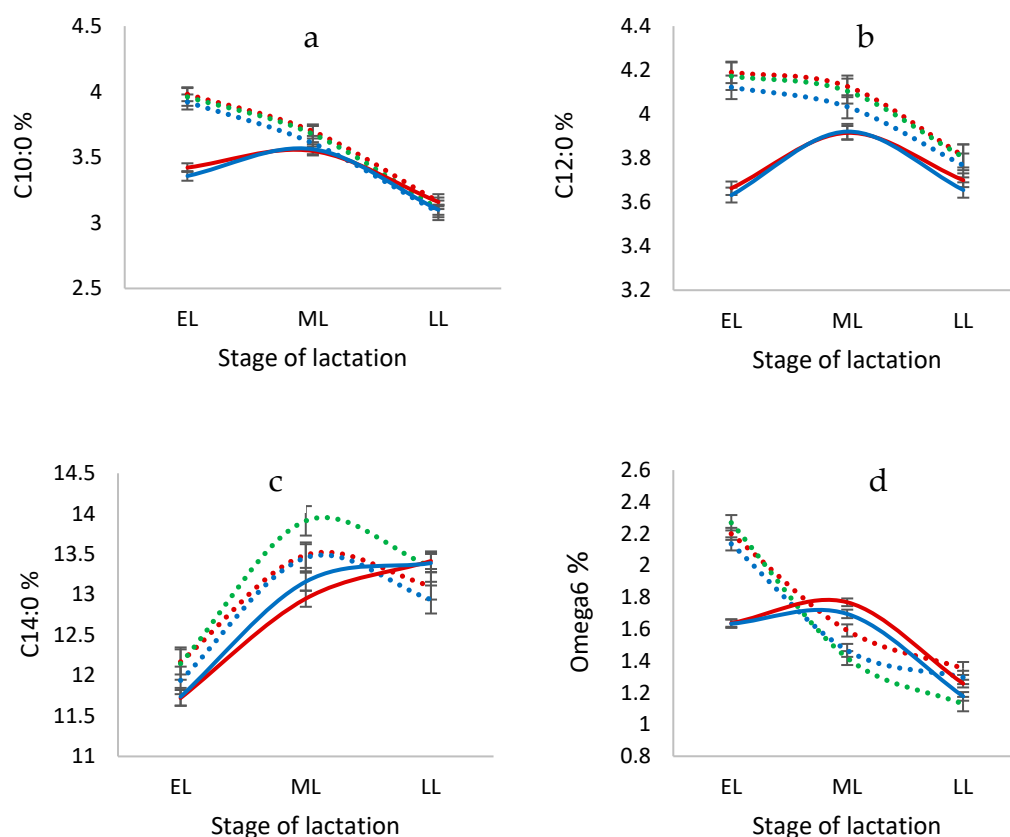

**Figure S2.** Concentrations of (a) C10:0, (b) C12:0 and (c) C14:0 (d) omega6 in milk from Holstein-Friesian (....), Holstein-Friesian × Jersey (....) and Jersey (....) cows milked OAD and Holstein-Friesian (—) and Holstein-Friesian × Jersey (—) cows milked TAD during the production season 2020-2021. EL = early lactation (<90 days); ML = mid lactation (90-180 days); LL= late lactation (>180 days). The vertical bars show standard errors.
