# Supplementary material
Source: MDPI journal article supplement (https://www.mdpi.com/2624-862X/3/3/43)
Supplement: s1 [file s1]

Archive with 1 entries (1 files):
- dairy-1712483-supplementary.pdf
